# Supplementary material
Source: PubMed Central journal article supplement (PMC438997)

**A**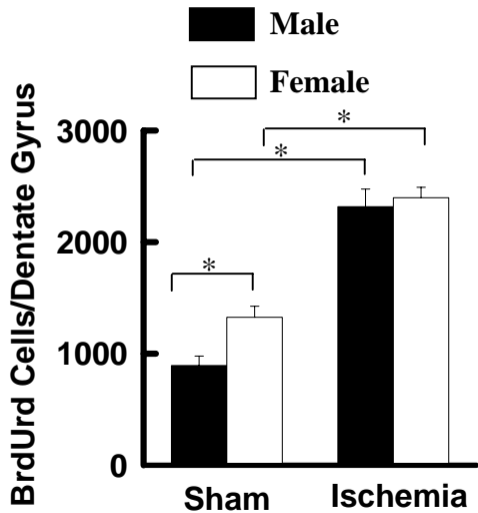**B**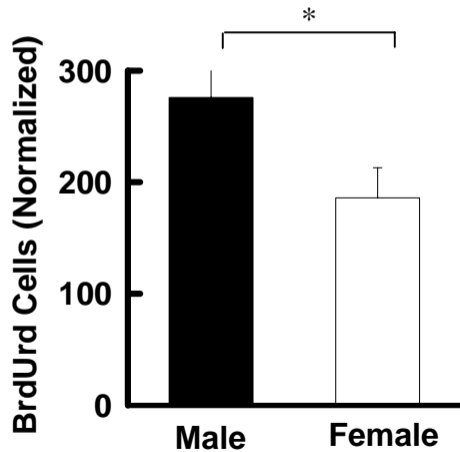

Supplement: pnas_101_25_9453__1.pdf [file pnas_101_25_9453__1.pdf]

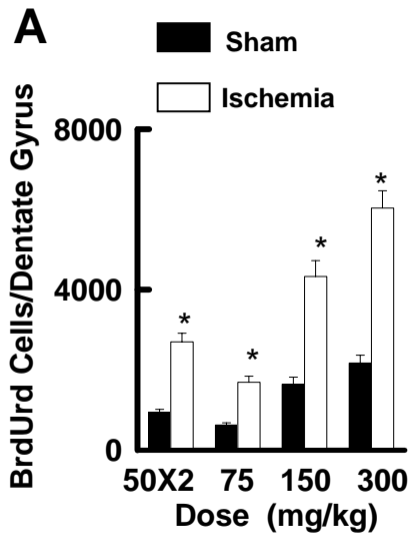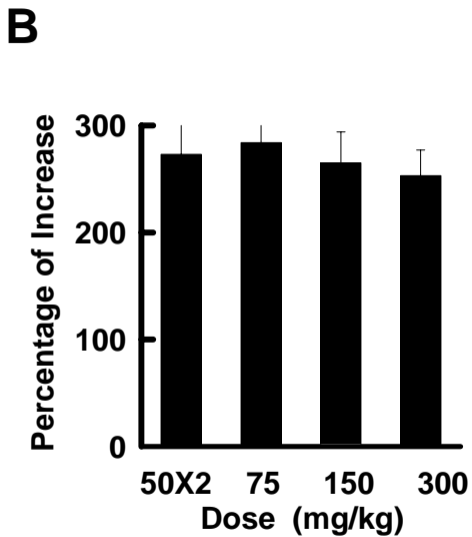

Supplement: pnas_101_25_9453__2.pdf [file pnas_101_25_9453__2.pdf]
